# Supplementary material for: Hydrological trade-offs due to different land covers and land uses in the Brazilian Cerrado
Source: Copernicus journal article supplement (doi:10.5194/hess-2018-415), 2018-08-29
Supplement: Supplementary file [file hess-2018-415-AC3-supplement.pdf]

**Table 1: Monitoring site instrumentation characteristics.**

| Variable                                             | Sensor                    | Height or depth (m)             | Measurement range                        | Maximum error                  | Site no. |
|------------------------------------------------------|---------------------------|---------------------------------|------------------------------------------|--------------------------------|----------|
| Temperature (°C) and relative humidity (%)           | HMP45C                    | 2.0                             | -39.2 to +60°C and 0.8% to 100%          | ±0.5°C and ±3%                 | 1        |
|                                                      | HC2S3                     | 9.5 and 11.0                    |                                          | ±0.1°C and ±0.8%               | 2        |
| Rainfall (mm)                                        | Hydrological Services TB4 | 1.5 and 11.0                    | 0 to 700 mm h <sup>-1</sup>              | ±3%                            | 1 and 2  |
| Atmospheric pressure (mbar)                          | Vaisala CS106             | 1.0                             | 500 to 1100 mBar                         | ±1.5 mBar                      | 1        |
| Wind direction (°) and velocity (m.s <sup>-1</sup> ) | Young 05103               | 2.0 and 11.0                    | 0 to 360° and 0 to 100 m s <sup>-1</sup> | ±3° and ±0.3 m s <sup>-1</sup> | 1 and 2  |
| Solar radiation (MJ.m <sup>-2</sup> )                | Kipp & Zonen CMP3         | 2.0                             | 0 to 2000 W m <sup>-2</sup>              | ±5%                            | 1        |
| Soil moisture (%)                                    | FDR Environscan Sentek    | -0.3; -0.6 and -                |                                          |                                | 1*       |
|                                                      |                           | 0.9                             | 0 to ~65%                                | ±3%                            |          |
|                                                      |                           | -0.1; -0.5; -0.7; -1.0 and -1.5 |                                          |                                | 2        |
| Net solar radiation (W.m <sup>-2</sup> )             | Kipp & Zonen NR-LITE2     | 11.0                            | ±2000 W m <sup>-2</sup>                  | ±5%                            | 2        |
| Soil heat flux (W.m <sup>-2</sup> )                  | Hukseflux HFP01           | -0.1                            | ±2000 W m <sup>-2</sup>                  | -15% to +5%                    | 2        |
| Water table (groundwater) (m)                        | Diver Schlumberger        | -40.0 and -39.2                 | 0 to 10 m                                | ± 2.5 cm                       | 1 and 2  |

\*At site 1, the bare soil did not have soil moisture probes.
